# Supplementary material
Source: Springer Nature journal article supplement (https://www.springermedizin.de/resource/supplementary/13075_2014_4243_MOESM7_ESM.pdf/9696466)

**A**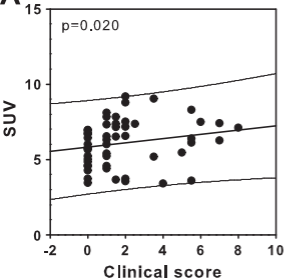**B**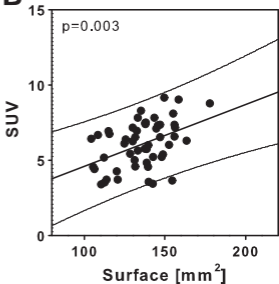

Supplement: MOESM7 [file 9696466]
